# Supplementary material
Source: HighWire-hosted journal article supplement (https://thorax.bmj.com/content/thoraxjnl-2017-211216)
Supplement: inline-supplementary-material-1 [file inline-supplementary-material-1.pdf]

## **SUPPLEMENTARY FILE**

### **Procedure to derive peak height and weight velocities and adiposity peak**

**Peak height and weight velocities** Peak height velocity (PHV) and peak weight velocity (PWV) were derived from postnatal growth data using the Reed1 model for boys and girls separately using the previously described procedure (1, 2). The Reed1 model was chosen since it showed a better fit to the early growth data than the Kouchi, Carlberg, and Count models, and it showed an equally good fit to the Reed2 model which has one more parameter than the Reed1 model (3). The difference compared with the simpler models, for example, the Count model, is that the Reed1 model allows the velocity to peak after birth, whereas other models force it to peak at birth. In the first couple of weeks after birth, weight may drop up to 10% in normal individuals. The PWV is thus usually not in the first weeks after birth, but slightly later. Therefore, the Reed1 model is more realistic (especially for weight) and more flexible. The Reed1 model was fitted by sex on all height and weight measurements taken at 0-3 years of age, including birth weight. We assumed both a fixed and a random component for all our parameters in the model. For each person, the first derivative of the fitted distance curve was taken to obtain the height and weight velocity curves. Subsequently, the maximum of these curves was taken to obtain the PHV and the PWV in infancy. The Reed1 model is a four-parameter extension of the three-parameter Count model and its functional form is (3, 4):  $Y = A + Bt + C\ln(t) + D/t$

Since this model is not defined at birth ( $t=0$ ), it was modified for this study in the same way as in Simondon et al.:  $Y = A + Bt + C\ln(t+1) + D/(t+1)$  where  $t$ , postnatal age;  $Y$ , height or weight reached at age  $t$  and  $A$ ,  $B$ ,  $C$ , and  $D$  the function parameters. Of the function parameters,  $A$  is related to the baseline height or weight at birth,  $B$  to the linear

component of the growth velocity over time, and D to the inflection point that allows growth velocity to peak after birth rather than exactly at birth. The Reed1 model is linear and its constants. Having two measurements was inadequate to capture the shape of the growth curve, and therefore, we restricted all association analyses to those with a minimum of three measurements per person.

**Adiposity peak** For body mass index at adiposity peak (BMIAP), a cubic mixed effects model was previously fitted on log(BMI) from 14 days to 1.5 years, using sex as a covariate (2). Modelization of body mass index growth was performed from the age of 14 days onward, since, as mentioned before, children may lose up to 10% of their body weight in the first 2 weeks of life. When fitting the model, age was centralized to 0.75 years. In addition to fixed effects, we included random effects for the constant and the slope in the model. An autoregressive within person correlation structure between measurements was assumed. Then, body mass index was derived for each individual at the point where the curve reaches its maximum, i.e. at infant adiposity peak.

## References

1. Sovio U, Bennett AJ, Millwood IY, Molitor J, O'Reilly PF, Timpson NJ *et al.* Genetic determinants of height growth assessed longitudinally from infancy to adulthood in the northern Finland birth cohort 1966. *PLoS.Genet.* 2009; 5:e1000409.
2. Tzoulaki I, Sovio U, Pillas D, Hartikainen AL, Pouta A, Laitinen J *et al.* Relation of immediate postnatal growth with obesity and related metabolic risk factors in adulthood: the northern Finland birth cohort 1966 study. *Am.J.Epidemiol.* 2010; 171:989-998.
3. Berkey CS, Reed RB. A model for describing normal and abnormal growth in early childhood. *Hum.Biol.* 1987; 59:973-987.
4. Parametric models for postnatal growth. In: *Methods in Human Growth Research.* Editors: Hauspie RC, Cameron N, Molinari L. Cambridge University press, 2004; pp. 205-233.

**Supplementary File Figure S1** Diagram showing the association of early childhood growth patterns and lung function and current asthma, including the potential confounders, effect modifiers, and potential mediators (dashed lines)

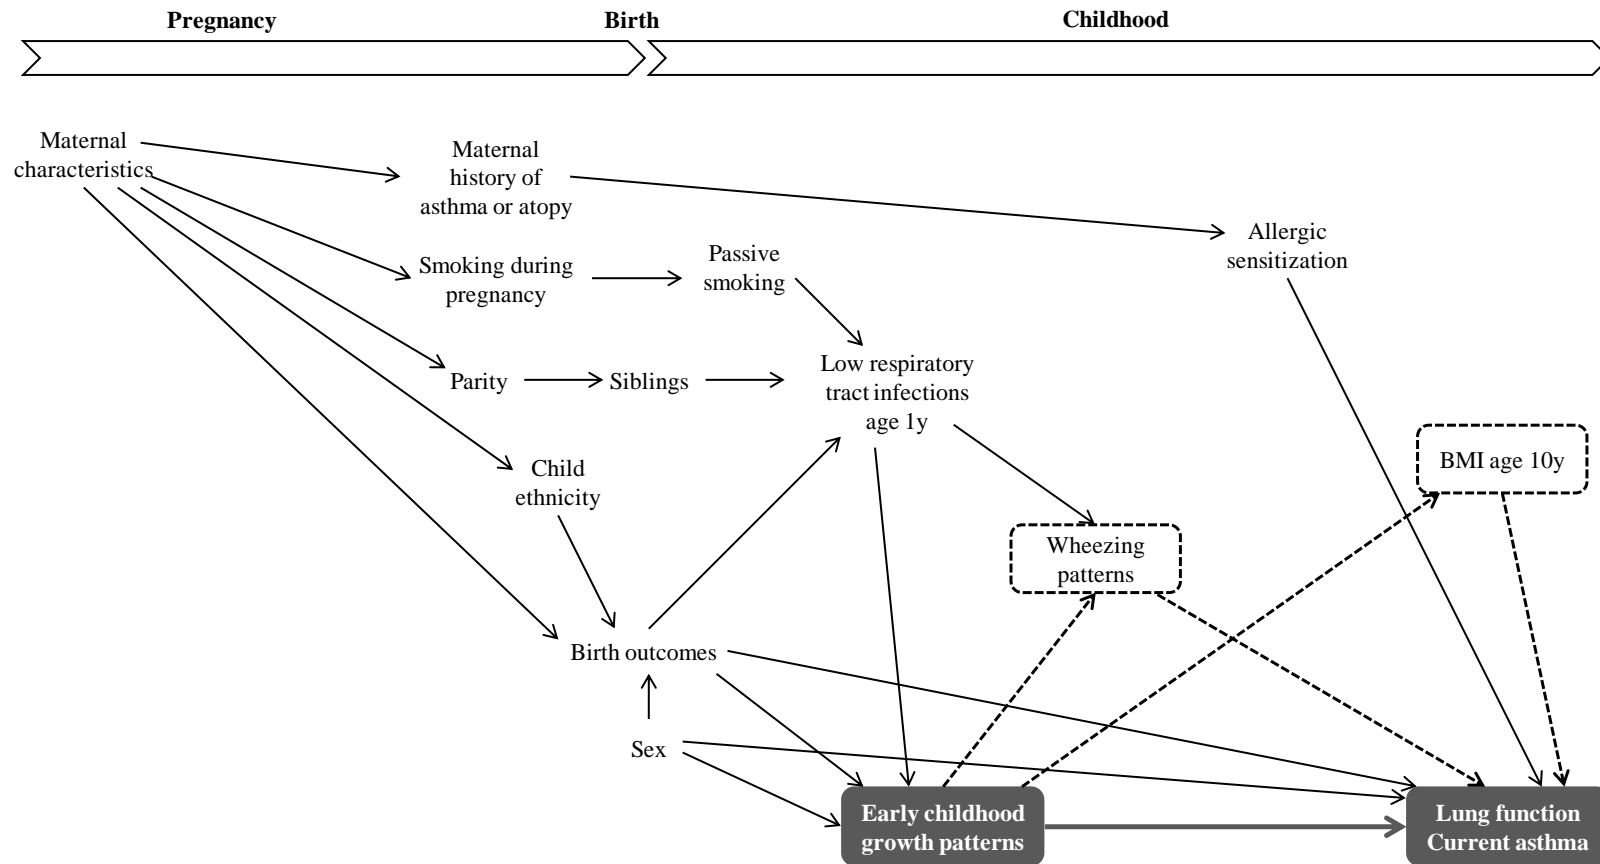

Maternal characteristics include: age at enrolment, pre-pregnancy body mass index, educational level, pet keeping, psychological distress during pregnancy, gestational diabetes, and gestational hypertensive disorders.

**Supplementary File Figure S2** Structural equation model of the association of early childhood growth patterns with lung function parameters

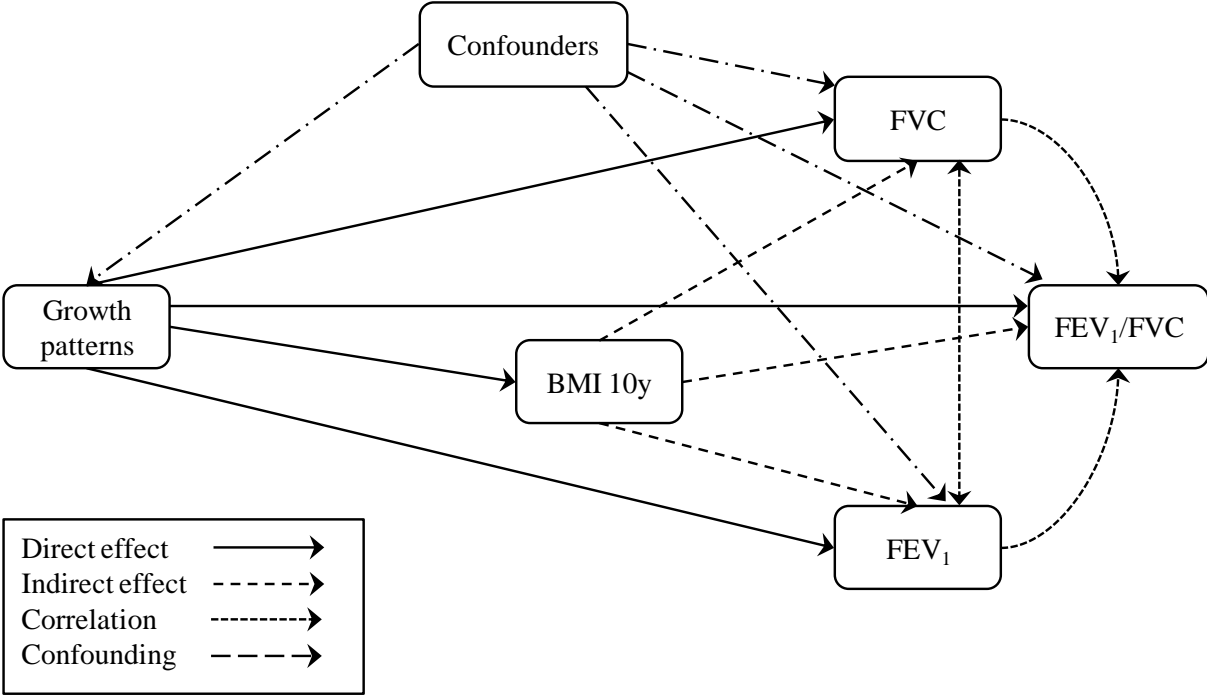

**Supplementary File Figure S3** Flow chart of participants included for analysis

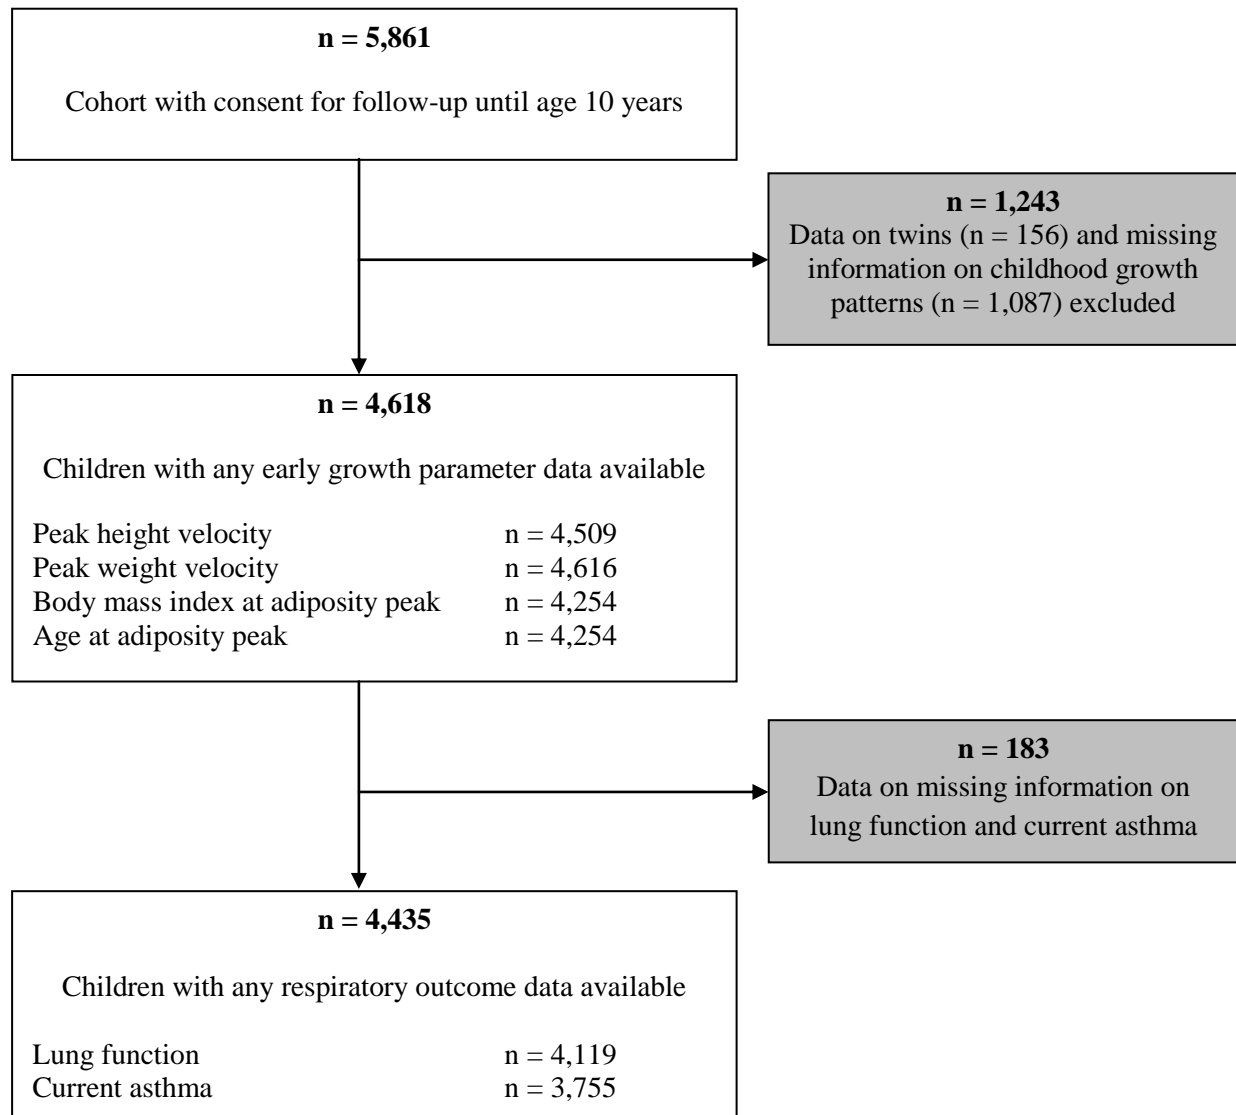

**Supplementary File Table S1** Difference in characteristics between subjects included and not included in the study

|                                                    | Included<br>n = 4,435 | Not included<br>n = 1,426 | <i>P</i> -value<br>differences |
|----------------------------------------------------|-----------------------|---------------------------|--------------------------------|
| <b>Maternal characteristics</b>                    |                       |                           |                                |
| Age at enrolment (years)                           | 31.4 (4.7)            | 29.8 (5.5)                | <0.01                          |
| Pre-pregnancy body mass index (kg/m <sup>2</sup> ) | 24.4 (4.2)            | 25.5 (4.6)                | <0.01                          |
| Educational level                                  |                       |                           |                                |
| Primary or secondary                               | 44.8                  | 66.4                      | <0.01                          |
| Higher                                             | 55.2                  | 33.6                      |                                |
| History of asthma or atopy, yes                    | 44.9                  | 45.0                      | 0.98                           |
| Pet keeping, yes                                   | 33.3                  | 33.4                      | 0.95                           |
| Psychological distress during pregnancy, yes       | 7.2                   | 13.0                      | <0.01                          |
| Parity, multiparous                                | 42.0                  | 46.0                      | 0.01                           |
| Smoked during pregnancy, yes                       | 22.6                  | 27.1                      | <0.01                          |
| Gestational hypertensive disorders, yes            | 4.1                   | 4.5                       | 0.61                           |
| Gestational diabetes, yes                          | 0.7                   | 2.2                       | <0.01                          |
| <b>Infant characteristics</b>                      |                       |                           |                                |
| Sex, female                                        | 50.3                  | 49.9                      | 0.77                           |
| Gestational age (weeks) <sup>1</sup>               | 40.1 (26.7-<br>43.4)  | 39.9 (26.3-<br>43.6)      | <0.01                          |
| Birth weight (g)                                   | 3456 (543)            | 3262 (640)                | <0.01                          |
| Ethnicity, non-European                            | 28.5                  | 45.1                      | <0.01                          |
| Breastfeeding, never                               | 7.6                   | 7.2                       | 0.75                           |
| Day care attendance age 1 year, yes                | 63.2                  | 50.3                      | <0.01                          |
| Lower respiratory tract infections age 1 year, yes | 13.2                  | 16.0                      | 0.14                           |
| Passive smoking age 1 year, yes                    | 16.1                  | 18.0                      | 0.32                           |
| <b>Child characteristics</b>                       |                       |                           |                                |
| Age at the time of respiratory outcomes (years)    | 9.8 (0.3)             | 9.8 (0.5)                 | <0.01                          |
| Body mass index at age 10 years (z-score)          | 0.2 (1.0)             | 0.4 (1.1)                 | <0.01                          |

Values are percentages for categorical variables and means (SD) or median (range)<sup>1</sup> for continuous variables. Non-imputed data. *P*-value (included vs. excluded) was estimated by using One-Way Anova, Wilcoxon, or Chi-square tests.

**Supplementary File Table S2** Effect modification by child's sex, maternal history of asthma or atopy, preterm birth, small for gestational age, and inhalant allergic sensitization of the association of early childhood growth patterns with lung function and current asthma

|                            | Child's sex<br><i>p</i> -value for<br>interaction | Maternal history<br>of asthma or<br>atopy<br><i>p</i> -value for<br>interaction | Preterm birth<br><i>p</i> -value for<br>interaction | Small for<br>gestational<br>age<br><i>p</i> -value for<br>interaction | Child's inhalant<br>allergic<br>sensitization<br><i>p</i> -value for<br>interaction |
|----------------------------|---------------------------------------------------|---------------------------------------------------------------------------------|-----------------------------------------------------|-----------------------------------------------------------------------|-------------------------------------------------------------------------------------|
| <b>FVC</b>                 |                                                   |                                                                                 |                                                     |                                                                       |                                                                                     |
| PHV                        | 0.557                                             | 0.907                                                                           | 0.871                                               | 0.024                                                                 | 0.413                                                                               |
| PWV                        | 0.251                                             | 0.906                                                                           | 0.687                                               | 0.041                                                                 | 0.544                                                                               |
| BMIAP                      | 0.053                                             | 0.833                                                                           | 0.978                                               | 0.095                                                                 | 0.849                                                                               |
| AGEAP                      | 0.001                                             | 0.417                                                                           | 0.726                                               | 0.641                                                                 | 0.440                                                                               |
| <b>FEV<sub>1</sub></b>     |                                                   |                                                                                 |                                                     |                                                                       |                                                                                     |
| PHV                        | 0.352                                             | 0.947                                                                           | 0.455                                               | 0.084                                                                 | 0.692                                                                               |
| PWV                        | 0.215                                             | 0.322                                                                           | 0.825                                               | 0.275                                                                 | 0.724                                                                               |
| BMIAP                      | 0.041                                             | 0.867                                                                           | 0.994                                               | 0.330                                                                 | 0.534                                                                               |
| AGEAP                      | <0.001                                            | 0.409                                                                           | 0.239                                               | 0.319                                                                 | 0.597                                                                               |
| <b>FEV<sub>1</sub>/FVC</b> |                                                   |                                                                                 |                                                     |                                                                       |                                                                                     |
| PHV                        | 0.530                                             | 0.777                                                                           | 0.561                                               | 0.477                                                                 | 0.344                                                                               |
| PWV                        | 0.869                                             | 0.098                                                                           | 0.938                                               | 0.146                                                                 | 0.680                                                                               |
| BMIAP                      | 0.943                                             | 0.754                                                                           | 0.988                                               | 0.229                                                                 | 0.264                                                                               |
| AGEAP                      | 0.578                                             | 0.839                                                                           | 0.312                                               | 0.031                                                                 | 0.789                                                                               |
| <b>FEF<sub>75</sub></b>    |                                                   |                                                                                 |                                                     |                                                                       |                                                                                     |
| PHV                        | 0.684                                             | 0.857                                                                           | 0.503                                               | 0.996                                                                 | 0.322                                                                               |
| PWV                        | 0.711                                             | 0.147                                                                           | 0.680                                               | 0.248                                                                 | 0.296                                                                               |
| BMIAP                      | 0.543                                             | 0.747                                                                           | 0.700                                               | 0.495                                                                 | 0.152                                                                               |
| AGEAP                      | 0.164                                             | 0.567                                                                           | 0.471                                               | 0.014                                                                 | 0.518                                                                               |
| <b>Current asthma</b>      |                                                   |                                                                                 |                                                     |                                                                       |                                                                                     |
| PHV                        | 0.437                                             | 0.236                                                                           | 0.991                                               | 0.204                                                                 | 0.844                                                                               |
| PWV                        | 0.536                                             | 0.105                                                                           | 0.430                                               | 0.773                                                                 | 0.299                                                                               |
| BMIAP                      | 0.657                                             | 0.031                                                                           | 0.336                                               | 0.730                                                                 | 0.129                                                                               |
| AGEAP                      | 0.033                                             | 0.535                                                                           | 0.291                                               | 0.624                                                                 | 0.002                                                                               |

PHV, peak height velocity; PWV, peak weight velocity; BMIAP, body mass index at adiposity peak; AGEAP, age at adiposity peak.

**Supplementary File Table S3** Sequential adjustment of the association of early childhood growth patterns with lung function and current asthma in the overall population

|                 | Minimally adjusted model | + Maternal characteristics | + Socioeconomic characteristics | + Maternal history of asthma or atopy | + Maternal psychological distress during pregnancy | + Birth outcomes     | + Child characteristics - Fully adjusted model |
|-----------------|--------------------------|----------------------------|---------------------------------|---------------------------------------|----------------------------------------------------|----------------------|------------------------------------------------|
| <b>FVC</b>      |                          |                            |                                 |                                       |                                                    |                      |                                                |
| PHV             | -0.00 (-0.01, -0.00)     | -0.00 (-0.01, 0.00)        | -0.01 (-0.01, -0.00)            | -0.01 (-0.01, -0.00)                  | -0.01 (-0.01, -0.00)                               | -0.00 (-0.01, 0.00)  | -0.00 (-0.01, 0.00)                            |
| PWV             | 0.04 (0.02, 0.05)        | 0.04 (0.02, 0.05)          | 0.03 (0.01, 0.04)               | 0.03 (0.01, 0.04)                     | 0.03 (0.01, 0.04)                                  | 0.03 (0.02, 0.05)    | 0.03 (0.02, 0.05)                              |
| BMIAP           | 0.18 (0.15, 0.22)        | 0.18 (0.14, 0.22)          | 0.17 (0.13, 0.20)               | 0.17 (0.13, 0.20)                     | 0.17 (0.13, 0.20)                                  | 0.14 (0.10, 0.18)    | 0.15 (0.11, 0.19)                              |
| AGEAP           | -0.03 (-0.07, 0.01)      | -0.03 (-0.07, 0.01)        | -0.00 (-0.05, 0.04)             | -0.00 (-0.05, 0.04)                   | -0.00 (-0.05, 0.04)                                | 0.02 (-0.02, 0.07)   | 0.02 (-0.02, 0.06)                             |
| <b>FEV1</b>     |                          |                            |                                 |                                       |                                                    |                      |                                                |
| PHV             | -0.01 (-0.01, -0.00)     | -0.01 (-0.01, -0.00)       | -0.01 (-0.01, -0.00)            | -0.01 (-0.01, -0.00)                  | -0.01 (-0.01, -0.00)                               | -0.00 (-0.01, 0.00)  | -0.00 (-0.01, 0.00)                            |
| PWV             | 0.01 (-0.01, 0.02)       | 0.01 (-0.01, 0.02)         | -0.00 (-0.02, 0.01)             | -0.00 (-0.02, 0.01)                   | -0.00 (-0.02, 0.01)                                | 0.00 (-0.01, 0.02)   | 0.00 (-0.01, 0.02)                             |
| BMIAP           | 0.12 (0.08, 0.16)        | 0.11 (0.07, 0.15)          | 0.10 (0.06, 0.14)               | 0.10 (0.06, 0.14)                     | 0.10 (0.05, 0.14)                                  | 0.06 (0.02, 0.10)    | 0.06 (0.02, 0.10)                              |
| AGEAP           | -0.00 (-0.05, 0.04)      | 0.01 (-0.04, 0.05)         | 0.03 (-0.01, 0.08)              | 0.03 (-0.01, 0.08)                    | 0.03 (-0.01, 0.08)                                 | 0.07 (0.02, 0.11)    | 0.07 (0.02, 0.11)                              |
| <b>FEV1/FVC</b> |                          |                            |                                 |                                       |                                                    |                      |                                                |
| PHV             | -0.00 (-0.01, 0.00)      | -0.00 (-0.01, 0.00)        | -0.00 (-0.01, 0.00)             | -0.00 (-0.01, 0.00)                   | -0.00 (-0.01, 0.00)                                | -0.00 (-0.01, 0.00)  | -0.00 (-0.01, 0.00)                            |
| PWV             | -0.05 (-0.07, -0.03)     | -0.05 (-0.07, -0.04)       | -0.05 (-0.07, -0.04)            | -0.05 (-0.07, -0.04)                  | -0.05 (-0.07, -0.04)                               | -0.05 (-0.07, -0.04) | -0.05 (-0.07, -0.03)                           |
| BMIAP           | -0.11 (-0.15, -0.07)     | -0.13 (-0.17, -0.09)       | -0.13 (-0.17, -0.09)            | -0.13 (-0.17, -0.09)                  | -0.13 (-0.17, -0.09)                               | -0.15 (-0.19, -0.10) | -0.15 (-0.19, -0.10)                           |
| AGEAP           | 0.03 (-0.01, 0.08)       | 0.05 (0.00, 0.09)          | 0.06 (0.01, 0.10)               | 0.06 (0.01, 0.10)                     | 0.06 (0.01, 0.10)                                  | 0.06 (0.02, 0.11)    | 0.06 (0.02, 0.11)                              |
| <b>FEF75</b>    |                          |                            |                                 |                                       |                                                    |                      |                                                |
| PHV             | -0.01 (-0.01, -0.00)     | -0.01 (-0.01, -0.00)       | -0.01 (-0.01, -0.00)            | -0.01 (-0.01, -0.00)                  | -0.01 (-0.01, -0.00)                               | -0.01 (-0.01, -0.00) | -0.01 (-0.01, 0.00)                            |
| PWV             | -0.04 (-0.05, -0.02)     | -0.04 (-0.05, -0.02)       | -0.05 (-0.07, -0.04)            | -0.05 (-0.07, -0.04)                  | -0.05 (-0.07, -0.04)                               | -0.05 (-0.06, -0.03) | -0.05 (-0.06, -0.03)                           |
| BMIAP           | -0.05 (-0.08, -0.01)     | -0.06 (-0.10, -0.02)       | -0.07 (-0.11, -0.03)            | -0.07 (-0.11, -0.03)                  | -0.07 (-0.11, -0.03)                               | -0.10 (-0.14, -0.06) | -0.09 (-0.13, -0.05)                           |



|                       |                    |                    |                   |                   |                   |                   |                   |
|-----------------------|--------------------|--------------------|-------------------|-------------------|-------------------|-------------------|-------------------|
| AGEAP                 | 0.02 (-0.02, 0.06) | 0.04 (-0.00, 0.08) | 0.07 (0.02, 0.11) | 0.07 (0.02, 0.11) | 0.07 (0.02, 0.11) | 0.08 (0.04, 0.12) | 0.08 (0.04, 0.12) |
| <b>Current asthma</b> |                    |                    |                   |                   |                   |                   |                   |
| PHV                   | 1.01 (0.99, 1.02)  | 1.00 (0.99, 1.02)  | 1.00 (0.99, 1.02) | 1.00 (0.99, 1.02) | 1.00 (0.99, 1.02) | 1.00 (0.98, 1.01) | 1.00 (0.98, 1.01) |
| PWV                   | 1.03 (0.97, 1.10)  | 1.03 (0.96, 1.09)  | 1.01 (0.95, 1.08) | 1.02 (0.96, 1.09) | 1.02 (0.96, 1.09) | 1.01 (0.95, 1.08) | 1.00 (0.94, 1.07) |
| BMIAP                 | 1.14 (0.97, 1.34)  | 1.12 (0.95, 1.33)  | 1.11 (0.94, 1.32) | 1.13 (0.96, 1.34) | 1.14 (0.96, 1.34) | 1.12 (0.94, 1.34) | 1.09 (0.91, 1.30) |
| AGEAP                 | 0.85 (0.71, 1.01)  | 0.86 (0.72, 1.03)  | 0.88 (0.73, 1.05) | 0.88 (0.73, 1.06) | 0.88 (0.73, 1.06) | 0.88 (0.73, 1.06) | 0.88 (0.73, 1.07) |

PHV, peak height velocity; PWV, peak weight velocity; BMIAP, body mass index at adiposity peak; AGEAP, age at adiposity peak. Values represent differences in odds-ratios with their 95% confidence intervals (CI) per standard deviation score increase in childhood growth patterns and were obtained from linear or logistic regression models. One s.d.s of PHV equals 8.4 cm/year, of PWV 2.1 kg/year, of BMIAP 0.8 kg/m<sup>2</sup>, and of AGEAP 0.7 months (around 21 days). Models were adjusted for child's sex, age at the time of respiratory outcomes (Minimally adjusted model), maternal age at enrolment, pre-pregnancy BMI, parity (+ Maternal characteristics); maternal educational level, child's ethnicity, smoking during pregnancy (+ Socioeconomic characteristics); maternal history of asthma or atopy; maternal psychological distress during pregnancy; birth weight, gestational age (+ Birth outcomes); day care attendance, lower respiratory tract infections, and passive smoking at 1 year (+ Child characteristics – Fully adjusted model. This model is the one showed in Figure 1 of the main manuscript for the overall population).

**Supplementary File Table S4** Associations of early childhood growth patterns with lung function and current asthma in the overall population, in boys, and in girls.

|                 | Overall population |                      |         | Boys |                      |         | Girls |                      |         |
|-----------------|--------------------|----------------------|---------|------|----------------------|---------|-------|----------------------|---------|
|                 | N                  | $\beta$ (95% CI)     | p-value | N    | $\beta$ (95% CI)     | p-value | N     | $\beta$ (95% CI)     | p-value |
| <b>FVC</b>      |                    |                      |         |      |                      |         |       |                      |         |
| PHV             | 4027               | -0.00 (-0.01, 0.00)  | 0.253   | 1991 | -0.00 (-0.01, 0.00)  | 0.267   | 2036  | -0.00 (-0.01, 0.01)  | 0.832   |
| PWV             | 4117               | 0.03 (0.02, 0.05)    | <0.001  | 2036 | 0.03 (0.01, 0.05)    | 0.012   | 2081  | 0.04 (0.02, 0.06)    | 0.001   |
| BMIAP           | 3795               | 0.15 (0.11, 0.19)    | <0.001  | 1875 | 0.11 (0.06, 0.17)    | <0.001  | 1920  | 0.18 (0.12, 0.24)    | <0.001  |
| AGEAP           | 3795               | 0.02 (-0.02, 0.06)   | 0.379   | 1875 | 0.09 (0.03, 0.15)    | 0.005   | 1920  | -0.06 (-0.12, 0.01)  | 0.080   |
| <b>FEV1</b>     |                    |                      |         |      |                      |         |       |                      |         |
| PHV             | 4027               | -0.00 (-0.01, 0.00)  | 0.159   | 1991 | 0.00 (-0.01, 0.00)   | 0.103   | 2036  | -0.00 (-0.01, 0.01)  | 0.919   |
| PWV             | 4117               | 0.00 (-0.01, 0.02)   | 0.634   | 2036 | -0.00 (-0.03, 0.02)  | 0.740   | 2081  | 0.01 (-0.01, 0.04)   | 0.247   |
| BMIAP           | 3795               | 0.06 (0.02, 0.10)    | 0.004   | 1875 | 0.02 (-0.04, 0.08)   | 0.545   | 1920  | 0.10 (0.05, 0.16)    | <0.001  |
| AGEAP           | 3795               | 0.07 (0.02, 0.11)    | 0.005   | 1875 | 0.16 (0.09, 0.22)    | <0.001  | 1920  | -0.03 (-0.09, 0.03)  | 0.358   |
| <b>FEV1/FVC</b> |                    |                      |         |      |                      |         |       |                      |         |
| PHV             | 4027               | -0.00 (-0.01, 0.00)  | 0.424   | 1991 | -0.00 (-0.01, 0.00)  | 0.211   | 2036  | 0.00 (-0.01, 0.01)   | 0.917   |
| PWV             | 4117               | -0.05 (-0.07, -0.03) | <0.001  | 2036 | -0.05 (-0.07, -0.03) | <0.001  | 2081  | -0.05 (-0.07, -0.03) | <0.001  |
| BMIAP           | 3795               | -0.15 (-0.19, -0.10) | <0.001  | 1875 | -0.16 (-0.22, -0.09) | <0.001  | 1920  | -0.14 (-0.20, -0.08) | <0.001  |
| AGEAP           | 3795               | 0.06 (0.02, 0.11)    | 0.007   | 1875 | 0.08 (0.02, 0.15)    | 0.016   | 1920  | 0.05 (-0.02, 0.11)   | 0.151   |
| <b>FEF75</b>    |                    |                      |         |      |                      |         |       |                      |         |
| PHV             | 4027               | -0.01 (-0.01, 0.00)  | 0.003   | 1991 | -0.01 (-0.01, 0.00)  | 0.009   | 2036  | -0.00 (-0.01, 0.00)  | 0.125   |
| PWV             | 4117               | -0.05 (-0.06, -0.03) | <0.001  | 2036 | -0.05 (-0.07, -0.03) | <0.001  | 2081  | -0.04 (-0.07, -0.02) | <0.001  |
| BMIAP           | 3795               | -0.09 (-0.13, -0.05) | <0.001  | 1875 | -0.11 (-0.17, -0.05) | <0.001  | 1920  | -0.08 (-0.13, -0.02) | 0.009   |
| AGEAP           | 3795               | 0.08 (0.04, 0.12)    | <0.001  | 1875 | 0.11 (0.05, 0.17)    | <0.001  | 1920  | 0.05 (-0.01, 0.11)   | 0.135   |

| <b>Current</b> |      |                   |       |      |                   |       |      |                   |       |
|----------------|------|-------------------|-------|------|-------------------|-------|------|-------------------|-------|
| PHV            | 3688 | 1.00 (0.98, 1.01) | 0.818 | 1816 | 1.00 (0.98, 1.02) | 0.940 | 1872 | 0.99 (0.95, 1.02) | 0.496 |
| PWV            | 3753 | 1.00 (0.94, 1.07) | 0.973 | 1844 | 0.98 (0.91, 1.06) | 0.658 | 1909 | 1.04 (0.93, 1.17) | 0.476 |
| BMIAP          | 3501 | 1.09 (0.91, 1.30) | 0.343 | 1725 | 1.14 (0.91, 1.43) | 0.262 | 1776 | 1.05 (0.78, 1.40) | 0.760 |
| AGEAP          | 3501 | 0.88 (0.73, 1.07) | 0.214 | 1725 | 0.75 (0.59, 0.96) | 0.022 | 1776 | 1.15 (0.83, 1.59) | 0.414 |

PHV, peak height velocity; PWV, peak weight velocity; BMIAP, body mass index at adiposity peak; AGEAP, age at adiposity peak. Values represent changes in z-scores with their 95% confidence intervals (CI) per standard deviation (s.d.s) increase in childhood growth patterns, and were obtained from linear or logistic regression models. One s.d.s of PHV equals 8.4 cm/year, of PWV 2.1 kg/year, of BMIAP 0.8 kg/m<sup>2</sup>, and of AGEAP 0.7 months (around 21 days). Models were adjusted for maternal age at enrolment, pre-pregnancy BMI, educational level, history of asthma or atopy, psychological distress during pregnancy, parity, smoking during pregnancy, and child's sex (only the overall population models), gestational age, birth weight, ethnicity, day care attendance, lower respiratory tract infections, and passive smoking at 1 year, and age at the time of respiratory outcomes. Effect estimates are the same as in Figure 1.
